# Supplementary material for: Getting to FP2020: Harnessing the private sector to increase modern contraceptive access and choice in Ethiopia, Nigeria, and DRC
Source: PubMed Central journal article supplement (PMC5812628; doi:10.1371/journal.pone.0192522), 2018-02-14
Supplement: pone.0192522.s002.pdf [file pone.0192522.s002.pdf]

**Supplemental Table 2: Selected Clusters by Geopolitical Zones in Nigeria and DRC (One-stage sampling)**

| Country        | Geopolitical Zones (Strata) | First Stage Selected Clusters |
|----------------|-----------------------------|-------------------------------|
| <b>Nigeria</b> |                             | Localities                    |
|                | North Central               | 58                            |
|                | North East                  | 25                            |
|                | North West                  | 29                            |
|                | South East                  | 39                            |
|                | South South                 | 30                            |
|                | South West                  | 19                            |
| <b>DRC</b>     |                             | Health Areas                  |
|                | Kinshasa                    | 34                            |
|                | Katanga                     | 80                            |
