# Supplementary material for: Getting to FP2020: Harnessing the private sector to increase modern contraceptive access and choice in Ethiopia, Nigeria, and DRC
Source: PubMed Central journal article supplement (PMC5812628; doi:10.1371/journal.pone.0192522), 2018-02-14
Supplement: pone.0192522.s004.pdf [file pone.0192522.s004.pdf]

| <b>Supplemental Table 4: Availability of modern contraceptive method types among all screened outlets, by country and outlet type</b> |                |                    |              |               |
|---------------------------------------------------------------------------------------------------------------------------------------|----------------|--------------------|--------------|---------------|
| <b>Availability of Methods, Excluding condoms</b>                                                                                     | All Public     | Private for profit | Pharmacy     | Drug Shop     |
| <b>Ethiopia</b>                                                                                                                       | <i>n=1,081</i> | <i>n=586</i>       | <i>n=215</i> | <i>n=292</i>  |
| Any modern method (exc. condoms)                                                                                                      | 97.8           | 93.0               | 100.0        | 95.7          |
| Any short-acting methods (exc. condoms)                                                                                               | 96.1           | 83.2               | 100.0        | 95.7          |
| Any LAPM                                                                                                                              | 74.1           | 18.4               | 10.9         | 6.5           |
| <b>Nigeria</b>                                                                                                                        | <i>n=240</i>   | <i>n=332</i>       | <i>n=230</i> | <i>n=2801</i> |
| Any modern method (exc. condoms)                                                                                                      | 59.1           | 49.7               | 88.5         | 53.7          |
| Any short-acting methods (exc. condoms)                                                                                               | 56.1           | 46.6               | 88.5         | 53.7          |
| Any LAPM                                                                                                                              | 21.7           | 30.2               | 1.2          | 0.0           |
| <b>DRC</b>                                                                                                                            | <i>n=516</i>   | <i>n=386</i>       | <i>n=68</i>  | <i>n=1135</i> |
| Any modern method (exc. condoms)                                                                                                      | 47.3           | 15.4               | 64.4         | 50.1          |
| Any short-acting methods (exc. condoms)                                                                                               | 42.9           | 14.1               | 64.4         | 50.0          |
| Any LAPM                                                                                                                              | 24.1           | 5.7                | 5.5          | 0.6           |
