# Supplementary material for: Getting to FP2020: Harnessing the private sector to increase modern contraceptive access and choice in Ethiopia, Nigeria, and DRC
Source: PubMed Central journal article supplement (PMC5812628; doi:10.1371/journal.pone.0192522), 2018-02-14
Supplement: pone.0192522.s005.pdf [file pone.0192522.s005.pdf]

**Supplemental Table 5: Consumer price of short-acting and LARC methods in USD per CYP, by country and outlet type**

| Price in USD per CYP            | Private for-profit            | Pharmacies                   | Drug Shops/PPMVs             |
|---------------------------------|-------------------------------|------------------------------|------------------------------|
| <b>Oral Contraceptives</b>      |                               |                              |                              |
| Ethiopia                        | \$ 2.19 (454) [2.19, 4.38]    | \$ 5.47 (494) [2.19, 8.76]   | \$ 2.19 (456) [2.19, 7.30]   |
| Nigeria                         | \$ 7.50 (76) [5.25, 7.50]     | \$ 7.50 (202) [3.75, 7.50]   | \$ 6.00 (1,643) [3.75, 7.50] |
| DRC                             | \$ 4.95 (38) [0.00-8.25]      | \$ 13.20 (43) [6.05-51.15]   | \$ 4.95 (432) [3.30-8.25]    |
| <b>Emergency Contraceptives</b> |                               |                              |                              |
| Ethiopia                        | \$ 9.73 (170) [9.73, 14.60]   | \$ 9.73 (166) [9.73, 11.68]  | \$ 9.73 (189) [9.73, 11.68]  |
| Nigeria                         | \$ 30.00 (6) [30.00, 50.00]   | \$ 25.00 (191) [5.00, 30.00] | \$ 15.00 (449) [4.00, 25.00] |
| DRC                             | \$ 11.00 (8) [0.00-33.00]     | \$ 33.00 (62) [22.00-110.00] | \$ 26.40 (262) [22.00-33.00] |
| <b>Injectables</b>              |                               |                              |                              |
| Ethiopia                        | \$ 1.36 (415) [0.97, 1.95]    | \$ 0.97 (128) [0.97, 1.17]   | \$ 0.97 (172) [0.97, 1.56]   |
| Nigeria                         | \$ 10.00 (137) [10.00, 15.00] | \$ 4.50 (217) [3.00, 6.00]   | \$ 4.50 (394) [4.00, 8.00]   |
| DRC                             | \$ 6.60 (49) [4.40-13.20]     | \$ 2.20 (12) [1.76-2.20]     | \$ 2.20 (243) [1.76-4.40]    |
| <b>Implants</b>                 |                               |                              |                              |
| Ethiopia                        | \$ 0.46 (180) [0.29, 0.64]    | \$ 0.26 (8) [0.19, 0.84]     | \$ 0.30 (10) [0.00, 0.76]    |
| Nigeria                         | \$ 2.00 (28) [1.97, 2.63]     | \$ 1.58 (1) [1.58, 1.58]     | \$ 0.83 (2) [0.66, 1.00]     |
| DRC                             | \$ 1.88 (24) [0.58-3.91]      | \$ --                        | \$ 2.03 (7) [1.30-2.61]      |
| <b>IUDs</b>                     |                               |                              |                              |
| Ethiopia                        | \$ 0.32 (84) [0.16, 0.53]     | \$ 0.05 (5) [0.00, 0.21]     | \$ --                        |
| Nigeria                         | \$ 1.00 (47) [1.09, 1.63]     | \$ 0.27 (7) [0.27, 0.27]     | \$ 0.17 (6) [0.16, 0.22]     |
| DRC                             | \$ 1.08 (9) [0.72-1.10]       | \$ 14.40 (4) [1.79-14.70]    | \$ 0.48 (1) [0.48-0.48]      |
