# Supplementary material for: Getting to FP2020: Harnessing the private sector to increase modern contraceptive access and choice in Ethiopia, Nigeria, and DRC
Source: PLoS One. 2018 Feb 14;13(2):e0192522. doi: 10.1371/journal.pone.0192522 (PMC5812628; doi:10.1371/journal.pone.0192522)
Supplement: S3 Table — (PDF) [file pone.0192522.s003.pdf]

| Supplemental Table 3: Selected Clusters by Geopolitical Zones in Ethiopia (Two-stage sampling except for Addis Ababa) |                             |                               |                                |
|-----------------------------------------------------------------------------------------------------------------------|-----------------------------|-------------------------------|--------------------------------|
| Country                                                                                                               | Geopolitical Zones (Strata) | First Stage Selected Clusters | Second Stage Selected Clusters |
| Ethiopia                                                                                                              |                             | Woredas                       | Kebeles                        |
|                                                                                                                       | Addis Ababa                 | N/A*                          | 27                             |
|                                                                                                                       | Amhara                      | 30                            | 300                            |
|                                                                                                                       | Oromia                      | 30                            | 300                            |
|                                                                                                                       | SNNPR                       | 33                            | 330                            |
| * Addis Ababa does not have woredas so a single stage sample was taken at the level of the kebele using PPS.          |                             |                               |                                |
